# Supplementary material
Source: ML conference proceedings conference paper supplement (https://openreview.net/forum?id=98TY64tOFB)
Supplement: supplementary_material [file supplementary.pdf › CoT-Diff_supp/supplementary.pdf]

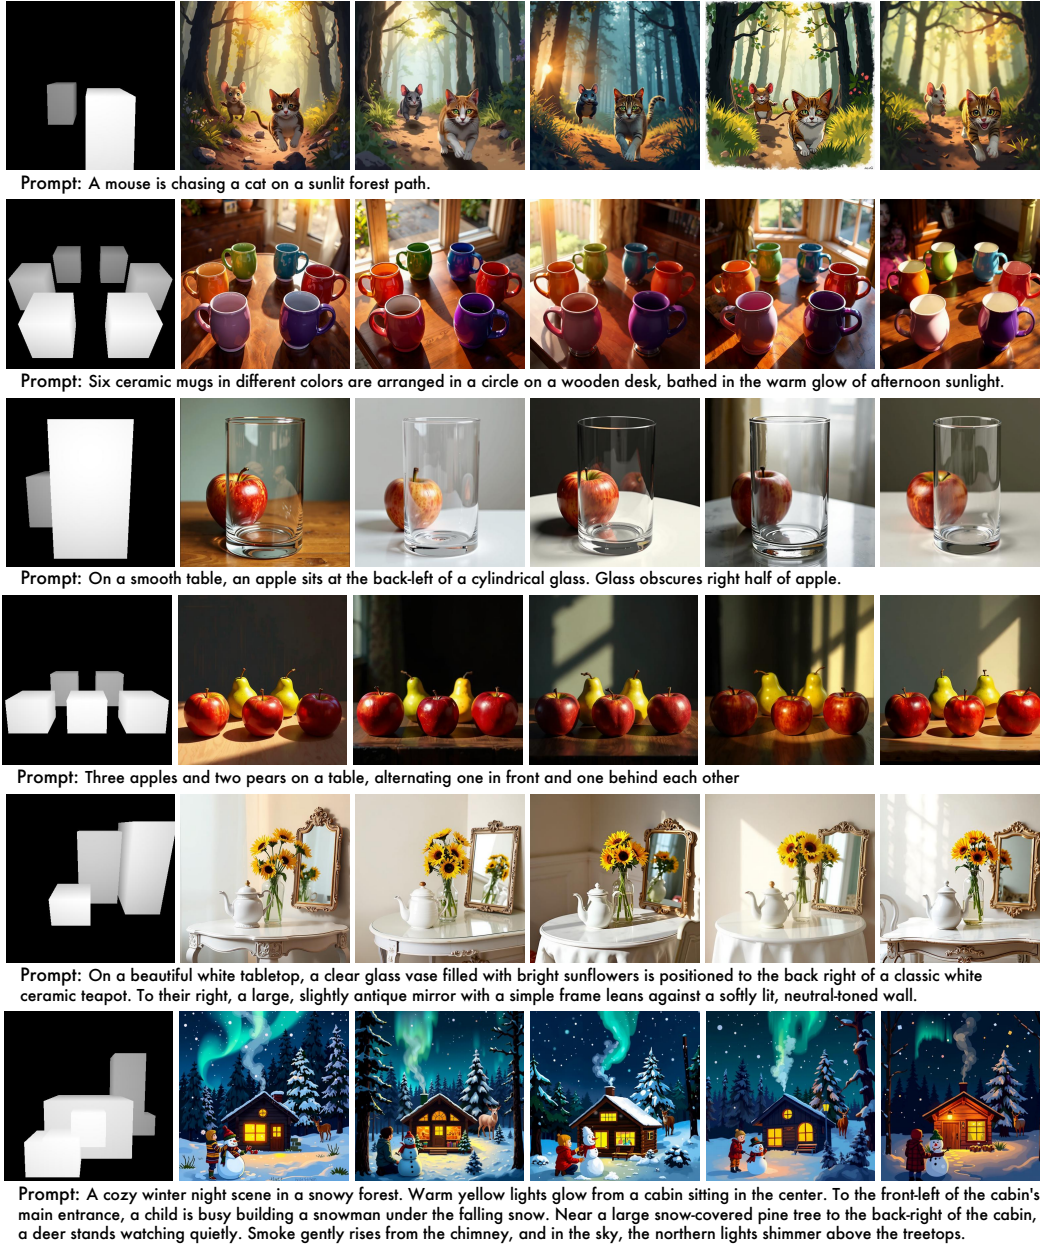

Figure 1: More visualization results of challenging spatial scenarios.

## A More Visualization Results of challenging spatial scenarios

Figure 1 shows more visualization examples of challenging spatial scenarios. For each scenario, we display the 3D layout planned by CoT-Diff alongside five results generated using different random seeds, demonstrating the precise spatial control capabilities of our method.

## B Further Visualization

Figure 2 displays images generated by CoT-Diff on 3DSceneBench. We randomly selected 8 prompts from 3DSceneBench and generated images using 5 different random seeds. Overall, the generated images show strong alignment with the input prompts while maintaining naturalness and high quality.

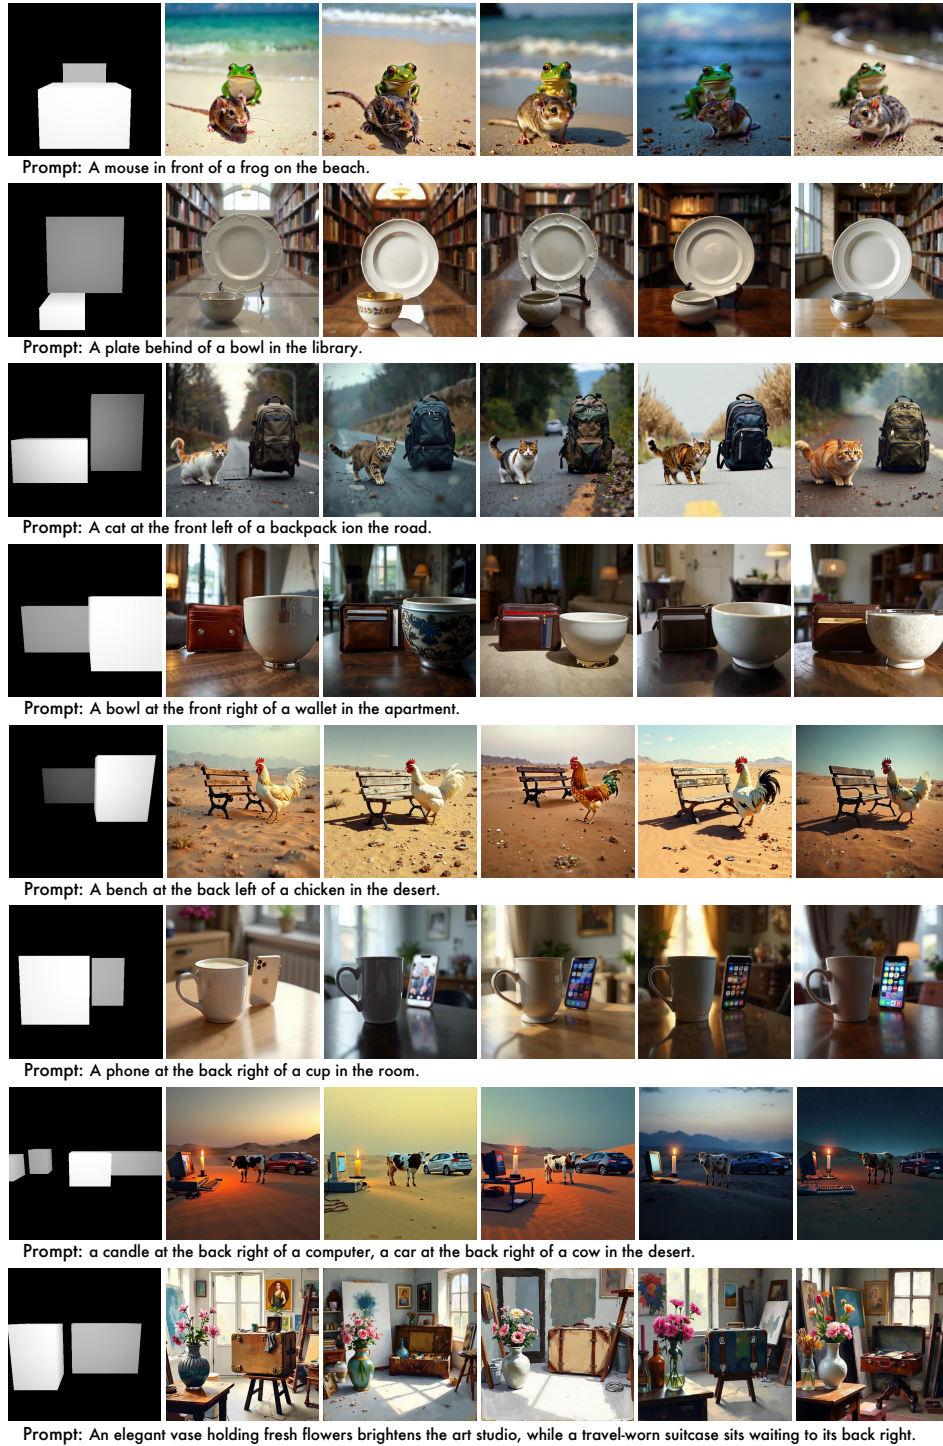

Figure 2: CoT-Diff visualizations on 3DSceneBench: 3D layout depth maps (left) and corresponding generated images (right), from 8 random prompts with 5 random seeds each.
